# Supplementary material for: KIR/HLA genotypes confer susceptibility and progression in patients with autoimmune hepatitis
Source: PubMed Central journal article supplement — JHEP Rep. 2019 Oct 25;1(5):353–60. doi: 10.1016/j.jhepr.2019.09.003 (PMC7005656; doi:10.1016/j.jhepr.2019.09.003), 2019-10-25
Supplement: mmc1.pdf [file mmc1.pdf]

# **KIR/HLA genotypes confer susceptibility and progression in patients with autoimmune hepatitis**

Takeji Umemura, Satoru Joshita, Hiromi Saito, Kaname Yoshizawa,

Gary L. Norman, Eiji Tanaka, Masao Ota

## Table of contents

|                 |   |
|-----------------|---|
| Table S1.....   | 2 |
| Table S2.....   | 4 |
| Table S3.....   | 5 |
| Table S4.....   | 6 |
| References..... | 7 |

**Table S1. HLA Association Studies in Type 1 AIH.**

| Year | Author                    | Country   | HLA studied                  | Significant HLA association | AIH           | Controls        | P               |
|------|---------------------------|-----------|------------------------------|-----------------------------|---------------|-----------------|-----------------|
| 1980 | Mackay <sup>1</sup>       | Australia | A, B, DRw                    | DRw3                        | 74%           | 32%             |                 |
| 1987 | Krawitt <sup>2</sup>      | US        | A, B, DR                     | B8-DR3                      | 60% (6/10)    | 39% (20/51)     |                 |
| 1990 | Seki <sup>3</sup>         | Japan     | A, B, DR, DQ                 | Bw54                        | 45.2% (14/31) | 10.9% (42/386)  | < 0.000005      |
|      |                           |           |                              | DR4                         | 90.3% (28/31) | 38.6% (149/386) | < 0.000001      |
| 1991 | Donaldson <sup>4</sup>    | UK        | A, B, DR                     | A1-B8-DR3                   | 38% (42/110)  | 11% (11/100)    | <0.0005         |
|      |                           |           |                              | DR4                         | 80% (35/44)   | 39% (31/79)     | 0.0013 (Pc)     |
| 1992 | Seki <sup>5</sup>         | Japan     | DR, DQA1, DQB1, DPB1         | DRB1*0405                   | 67.3% (33/49) | 29.6% (13/44)   | < 0.005 (Pc)    |
|      |                           |           |                              | DQA1*0301                   | 91.8% (45/49) | 63.6% (28/44)   | < 0.05 (Pc)     |
|      |                           |           |                              | DQB1*0401                   | 65.3% (32/49) | 27.3% (12/44)   | < 0.001 (Pc)    |
| 1993 | Manabe <sup>6</sup>       | UK        | A, B, DR, DQ, DPB1           | A1-B8-DR3-DQ2-DPB1*0401     | 27% (27/101)  | 7% (7/105)      | < 0.0005        |
| 1994 | Doherty <sup>7</sup>      | UK        | DRB, DQA, DQB                | DRB3*0101                   | 58% (69/119)  | 25% (44/177)    |                 |
|      |                           |           |                              | DRB1*04:01                  | 81%           | 42%             | < 0.000001 (Pc) |
| 1994 | Fainboim <sup>8</sup>     | Argentina | DRB1, DQB1                   | DRB1*1301                   | 66.6%         | 10.5%           | 0.00001 (Pc)    |
|      |                           |           |                              | DQB1*0603                   |               |                 | 0.00001         |
| 1997 | Strettell <sup>9</sup>    | US        | A, B, DRB1, DQA1, DQB1, DPB1 | DRB1*0301                   | 51% (44/86)   | 19% (19/102)    | 0.00003 (Pc)    |
|      |                           |           |                              | DQA1*0501                   | 56% (48/86)   | 34% (35/102)    | 0.0341 (Pc)     |
|      |                           |           |                              | DQB1*0201                   | 58% (50/86)   | 30% (31/102)    | 0.00143 (Pc)    |
|      |                           |           |                              | DRB1*0401                   | 55% (23/42)   | 17% (14/83)     | 0.000132 (Pc)   |
|      |                           |           |                              | DRB1*1501                   | 12% (10/86)   | 30% (31/120)    | 0.021 (Pc)      |
|      |                           |           |                              | DQA1*0102                   | 17% (15/86)   | 38% (39/102)    | 0.0187 (Pc)     |
| 1997 | Strettell <sup>10</sup>   | UK        | C                            | Cw*0701                     | 54% (47/87)   | 34% (34/100)    | 0.024           |
| 1999 | Bittencourt <sup>11</sup> | Brazil    | DRB, DQB1                    | DRB1*13                     | 70% (78/111)  | 26% (33/129)    | < 0.00001       |
|      |                           |           |                              | DRB3                        | 93% (103/111) | 69% (89/129)    | 0.00007         |

|      |                        |             |                               |            |                 |                  |                             |
|------|------------------------|-------------|-------------------------------|------------|-----------------|------------------|-----------------------------|
|      |                        |             |                               | DQB1*06    | 68% (75/111)    | 41% (53/129)     | 0.00007                     |
| 1999 | Pando <sup>12</sup>    | Argentina   | DRB1, DRB3, DQA1, DQB1        | DRB1*0405  | 11% (9/84)      | 1% (2/208)       | < 0.005 (Pc)                |
| 2001 | Goldberg <sup>13</sup> | Brazil      | DRB1, DR3, DQA1, DAB1         | DRB1*1301  | 87% (34/39)     | 50% (11/22)      | 0.00247                     |
| 2003 | Qiu <sup>14</sup>      | China       | DRB1                          | DRB1*04    | 22% (7/32)      | 6% (3/48)        | 0.08 (Pc)                   |
| 2007 | Fortes <sup>15</sup>   | Venezuela   | A, B, C, DR, DQ               | DRB1*1301  | 34% (14/41)     | 7% (8/111)       | 0.003 (Pc)                  |
|      |                        |             |                               | DQB1*04    | 2% (1/41)       | 22% (24/111)     | 0.016 (Pc)                  |
| 2008 | Lim <sup>16</sup>      | Korea       | A, B, C, DRB1, DQB1           | DRB1*0405  | 37% (23/62)     | 14% (21/154)     | 0.0001                      |
|      |                        |             |                               | DQB1*0401  | 37% (23/62)     | 13% (20/154)     | 0.00006                     |
|      |                        |             |                               | DRB1*0406  | 2% (1/62)       | 12% (18/154)     | 0.018                       |
|      |                        |             |                               | DQB1*0301  | 13% (8/62)      | 28% (43/154)     | 0.024                       |
| 2014 | Umemura <sup>17</sup>  | Japan       | A, B, C, DRB1, DQB1, DPB1     | A*24:02    | 35% (108/312)   | 22% (90/402)     | 0.0053 (Pc)                 |
|      |                        |             |                               | C*01:02    | 23% (73/312)    | 14% (58/402)     | 0.036 (Pc)                  |
|      |                        |             |                               | DRB1*04:05 | 30% (95/312)    | 11% (45/402)     | $4.0 \times 10^{-9}$ (Pc)   |
|      |                        |             |                               | DQB1*04:01 | 30% (94/312)    | 11% (45/402)     | $3.7 \times 10^{-9}$ (Pc)   |
|      |                        |             |                               | DQB1*06:02 | 5% (17/312)     | 13% (53/402)     | 0.009 (Pc)                  |
| 2014 | de Boer <sup>18</sup>  | Netherlands | Genome-wide association study | DRB1*03:01 |                 |                  | $5.3 \times 10^{-49}$       |
|      |                        |             |                               | DQB1*04:01 |                 |                  | $2.8 \times 10^{-18}$       |
| 2017 | Oka <sup>19</sup>      | Japan       | DRB1, DQB1                    | DRB1*04:01 | 6.1% (22/360)   | 2.1% (22/1026)   | 0.0193 (Pc)                 |
|      |                        |             |                               | DRB1*04:05 | 51.4% (185/360) | 23.7% (243/1026) | $5.86 \times 10^{-20}$ (Pc) |
|      |                        |             |                               | DQB1*04:01 | 50.6% (182/360) | 20.8% (86/413)   | $6.99 \times 10^{-17}$ (Pc) |
|      |                        |             |                               | DRB1*13:02 | 8.3% (30/360)   | 15.9% (163/1026) | 0.0080 (Pc)                 |

---

Abbreviations: HLA, human leukocyte antigen; AIH, autoimmune hepatitis; Pc, corrected P.

**Table S2. HLA and KIR Frequencies in Type 1 AIH and Healthy Subjects.**

|                           | <b>AIH<br/>(n = 154)</b> | <b>Healthy subjects<br/>(n = 201)</b> | <b>P</b> | <b>OR (95% CI)</b> |
|---------------------------|--------------------------|---------------------------------------|----------|--------------------|
| HLA-A3 and -A11           | 38 (25%)                 | 48 (24%)                              | 0.862    |                    |
| HLA-B Bw4                 | 118 (77%)                | 154 (77%)                             | 0.999    |                    |
| HLA-B Bw4-80Ile           | 106 (69%)                | 110 (55%)                             | 0.0070   | 1.83 (1.18-2.84)   |
| HLA-B Bw4-80Thr           | 24 (16%)                 | 57 (28%)                              | 0.0045   | 0.47 (0.27-0.79)   |
| HLA-B Bw6                 | 144 (94%)                | 175 (87%)                             | 0.046    | 2.14 (1.00-4.58)   |
| HLA-C1                    | 154 (100%)               | 199 (99%)                             | 0.214*   |                    |
| HLA-C2                    | 18 (12%)                 | 49 (24%)                              | 0.0025   | 0.41 (0.23-0.74)   |
| HLA-DRB1*04:05-DQB1*04:01 | 92 (67%)                 | 42 (21%)                              | < 0.001  | 5.62 (3.52-8.97)   |
| KIR2DL1                   | 154 (100%)               | 201 (100%)                            | -        |                    |
| KIR2DL2                   | 24 (16%)                 | 28 (14%)                              | 0.662    |                    |
| KIR2DL3                   | 154 (100%)               | 201 (100%)                            | -        |                    |
| KIR2DL4                   | 154 (100%)               | 201 (100%)                            | -        |                    |
| KIR2DL5                   | 65 (42%)                 | 81 (40%)                              | 0.717    |                    |
| KIR2DS1                   | 62 (40%)                 | 78 (39%)                              | 0.781    |                    |
| KIR2DS2                   | 26 (17%)                 | 32 (16%)                              | 0.808    |                    |
| KIR2DS3                   | 20 (13%)                 | 28 (14%)                              | 0.797    |                    |
| KIR2DS4                   | 141 (92%)                | 191 (95%)                             | 0.189    |                    |
| KIR2DS5                   | 47 (31%)                 | 58 (29%)                              | 0.734    |                    |
| KIR3DL1                   | 145 (94%)                | 191 (95%)                             | 0.718    |                    |
| KIR3DL2                   | 152 (99%)                | 201(100%)                             | 0.366*   |                    |
| KIR3DL3                   | 152 (99%)                | 199 (99%)                             | 0.811*   |                    |
| KIR3DS1                   | 63 (41%)                 | 84 (42%)                              | 0.867    |                    |

\*Fisher's exact test.

Abbreviations: KIR, killer cell immunoglobulin-like receptor; AIH, autoimmune hepatitis.

**Table S3. HLA and KIR Frequencies in Type 1 AIH Patients with or without Liver Decompensation.**

|                 | <b>Liver<br/>decompensation<br/>(n = 19)</b> | <b>Liver<br/>compensation<br/>(n = 135)</b> | <b>P</b> | <b>OR (95% CI)</b> |
|-----------------|----------------------------------------------|---------------------------------------------|----------|--------------------|
| HLA-A3 and -A11 | 7 (37%)                                      | 31 (23%)                                    | 0.189    |                    |
| HLA-B Bw4       | 10 (53%)                                     | 108 (80%)                                   | 0.008    | 0.28 (0.10-0.74)   |
| HLA-B Bw4-80Ile | 8 (42%)                                      | 98 (73%)                                    | 0.007    | 0.25 (0.08-0.80)   |
| HLA-B Bw4-80Thr | 2 (11%)                                      | 22 (16%)                                    | 0.516*   |                    |
| HLA-B Bw6       | 18 (95%)                                     | 126 (93%)                                   | 0.816*   |                    |
| HLA-C1          | 19 (100%)                                    | 135 (100%)                                  | -        |                    |
| HLA-C2          | 3 (16%)                                      | 15 (11%)                                    | 0.831*   |                    |
| KIR2DL1         | 19 (100%)                                    | 135 (100%)                                  | -        |                    |
| KIR2DL2         | 1 (8%)                                       | 23 (16%)                                    | 0.324*   |                    |
| KIR2DL3         | 19 (100%)                                    | 135 (100%)                                  | -        |                    |
| KIR2DL4         | 19 (100%)                                    | 135 (100%)                                  | -        |                    |
| KIR2DL5         | 9 (47%)                                      | 56 (42%)                                    | 0.627    |                    |
| KIR2DS1         | 9 (47%)                                      | 53 (39%)                                    | 0.500    |                    |
| KIR2DS2         | 1 (8%)                                       | 25 (18%)                                    | 0.264*   |                    |
| KIR2DS3         | 3 (16%)                                      | 17 (13%)                                    | 0.981*   |                    |
| KIR2DS4         | 16 (84%)                                     | 125 (93%)                                   | 0.430*   |                    |
| KIR2DS5         | 8 (42%)                                      | 39 (29%)                                    | 0.241    |                    |
| KIR3DL1         | 16 (84%)                                     | 129 (96%)                                   | 0.147*   |                    |
| KIR3DL2         | 19 (100%)                                    | 133 (99%)                                   | 0.584*   |                    |
| KIR3DL3         | 19 (100%)                                    | 139 (99%)                                   | 0.584*   |                    |
| KIR3DS1         | 9 (47%)                                      | 54 (40%)                                    | 0.541    |                    |

\*Fisher's exact test.

Abbreviations: KIR, killer cell immunoglobulin-like receptor; AIH, autoimmune hepatitis.

**Table S4. HLA and KIR Frequencies in Type 1 AIH Patients According to Survival and Liver-related Death.**

|                 | <b>Death<br/>(n = 13)</b> | <b>Survival<br/>(n = 141)</b> | <b>P</b> | <b>OR (95% CI)</b> |
|-----------------|---------------------------|-------------------------------|----------|--------------------|
| HLA-A3 and -A11 | 4 (31%)                   | 34 (24%)                      | 0.844    |                    |
| HLA-B Bw4       | 6 (46%)                   | 112 (79%)                     | 0.007    | 0.22 (0.07-0.71)   |
| HLA-B Bw4-80Ile | 5 (39%)                   | 101 (72%)                     | 0.031*   | 0.25 (0.08-0.80)   |
| HLA-B Bw4-80Thr | 1 (8%)                    | 23 (16%)                      | 0.674*   |                    |
| HLA-B Bw6       | 12 (92%)                  | 132 (94%)                     | 0.686*   |                    |
| HLA-C1          | 13 (100%)                 | 141 (100%)                    | -        |                    |
| HLA-C2          | 0 (0%)                    | 18 (13%)                      | 0.358    |                    |
| KIR2DL1         | 13 (100%)                 | 141 (100%)                    | -        |                    |
| KIR2DL2         | 1 (8%)                    | 23 (16%)                      | 0.674*   |                    |
| KIR2DL3         | 13 (100%)                 | 141 (100%)                    | -        |                    |
| KIR2DL4         | 13 (100%)                 | 141 (100%)                    | -        |                    |
| KIR2DL5         | 6 (46%)                   | 59 (42%)                      | 0.763    |                    |
| KIR2DS1         | 6 (46%)                   | 56 (40%)                      | 0.651    |                    |
| KIR2DS2         | 1 (8%)                    | 25 (18%)                      | 0.591*   |                    |
| KIR2DS3         | 2 (15%)                   | 18 (13%)                      | 0.871*   |                    |
| KIR2DS4         | 11 (85%)                  | 130 (92%)                     | 0.675*   |                    |
| KIR2DS5         | 6 (46%)                   | 41 (29%)                      | 0.201    |                    |
| KIR3DL1         | 11 (85%)                  | 134 (95%)                     | 0.360*   |                    |
| KIR3DL2         | 13 (100%)                 | 139 (99%)                     | 0.397*   |                    |
| KIR3DL3         | 13 (100%)                 | 139 (99%)                     | 0.397*   |                    |
| KIR3DS1         | 6 (46%)                   | 57 (40%)                      | 0.688    |                    |

\*Fisher's exact test.

Abbreviations: KIR, killer cell immunoglobulin-like receptor; AIH, autoimmune hepatitis.

## References

- [1] Mackay IR, Tait BD. HLA associations with autoimmune-type chronic active hepatitis: identification of B8-DRw3 haplotype by family studies. *Gastroenterology* 1980;79:95-98.
- [2] Krawitt EL, Kilby AE, Albertini RJ, Schanfield MS, Chastenay BF, Harper PC, et al. Immunogenetic studies of autoimmune chronic active hepatitis: HLA, immunoglobulin allotypes and autoantibodies. *Hepatology* 1987;7:1305-1310.
- [3] Seki T, Kiyosawa K, Inoko H, Ota M. Association of autoimmune hepatitis with HLA-Bw54 and DR4 in Japanese patients. *Hepatology* 1990;12:1300-1304.
- [4] Donaldson PT, Doherty DG, Hayllar KM, McFarlane IG, Johnson PJ, Williams R. Susceptibility to autoimmune chronic active hepatitis: human leukocyte antigens DR4 and A1-B8-DR3 are independent risk factors. *Hepatology* 1991;13:701-706.
- [5] Seki T, Ota M, Furuta S, Fukushima H, Kondo T, Hino K, et al. HLA class II molecules and autoimmune hepatitis susceptibility in Japanese patients. *Gastroenterology* 1992;103:1041-1047.
- [6] Manabe K, Donaldson PT, Underhill JA, Doherty DG, Mieli-Vergani G, McFarlane IG, et al. Human leukocyte antigen A1-B8-DR3-DQ2-DPB1\*0401 extended haplotype in autoimmune hepatitis. *Hepatology* 1993;18:1334-1337.
- [7] Doherty DG, Donaldson PT, Underhill JA, Farrant JM, Duthie A, Mieli-Vergani G, et al. Allelic sequence variation in the HLA class II genes and proteins in patients with autoimmune hepatitis. *Hepatology* 1994;19:609-615.
- [8] Fainboim L, Marcos Y, Pando M, Capucchio M, Reyes GB, Galoppo C, et al. Chronic active autoimmune hepatitis in children. Strong association with a particular HLA-DR6 (DRB1\*1301) haplotype. *Hum Immunol* 1994;41:146-150.
- [9] Strettell MD, Donaldson PT, Thomson LJ, Santrach PJ, Moore SB, Czaja AJ, et al. Allelic basis for HLA-encoded susceptibility to type 1 autoimmune hepatitis. *Gastroenterology* 1997;112:2028-2035.
- [10] Strettell MD, Thomson LJ, Donaldson PT, Bunce M, O'Neill CM, Williams R. HLA-C genes and susceptibility to type 1 autoimmune hepatitis. *Hepatology* 1997;26:1023-1026.
- [11] Bittencourt PL, Goldberg AC, Cancado EL, Porta G, Carrilho FJ, Farias AQ, et al. Genetic heterogeneity in susceptibility to autoimmune hepatitis types 1 and 2. *Am J Gastroenterol*

1999;94:1906-1913.

[12] Pando M, Larriba J, Fernandez GC, Fainboim H, Ciocca M, Ramonet M, et al. Pediatric and adult forms of type I autoimmune hepatitis in Argentina: evidence for differential genetic predisposition. *Hepatology* 1999;30:1374-1380.

[13] Goldberg AC, Bittencourt PL, Mouglin B, Cancado EL, Porta G, Carrilho F, et al. Analysis of HLA haplotypes in autoimmune hepatitis type 1: identifying the major susceptibility locus. *Hum Immunol* 2001;62:165-169.

[14] Qiu DK, Ma X. Relationship between human leukocyte antigen-DRB1 and autoimmune hepatitis type I in Chinese patients. *J Gastroenterol Hepatol* 2003;18:63-67.

[15] Fortes Mdel P, Machado IV, Gil G, Fernandez-Mestre M, Dagher L, Leon RV, et al. Genetic contribution of major histocompatibility complex class II region to type 1 autoimmune hepatitis susceptibility in Venezuela. *Liver Int* 2007;27:1409-1416.

[16] Lim YS, Oh HB, Choi SE, Kwon OJ, Heo YS, Lee HC, et al. Susceptibility to type 1 autoimmune hepatitis is associated with shared amino acid sequences at positions 70-74 of the HLA-DRB1 molecule. *J Hepatol* 2008;48:133-139.

[17] Umemura T, Katsuyama Y, Yoshizawa K, Kimura T, Joshita S, Komatsu M, et al. Human leukocyte antigen class II haplotypes affect clinical characteristics and progression of type 1 autoimmune hepatitis in Japan. *PLoS One* 2014;9:e100565.

[18] de Boer YS, van Gerven NM, Zwiars A, Verwer BJ, van Hoek B, van Erpecum KJ, et al. Genome-wide association study identifies variants associated with autoimmune hepatitis type 1. *Gastroenterology* 2014;147:443-452 e445.

[19] Oka S, Furukawa H, Yasunami M, Kawasaki A, Nakamura H, Nakamura M, et al. HLA-DRB1 and DQB1 alleles in Japanese type 1 autoimmune hepatitis: The predisposing role of the DR4/DR8 heterozygous genotype. *PLoS One* 2017;12:e0187325.
